# Supplementary material for: Association between blood pressure and the risk of chronic kidney disease in treatment-naïve hypertensive patients
Source: PubMed Central journal article supplement — Kidney Res Clin Pract. 2021 Nov 17;41(1):31–42. doi: 10.23876/j.krcp.21.099 (PMC8816410; doi:10.23876/j.krcp.21.099), 2021-11-17
Supplement: j-krcp-21-099suppl1.pdf [file j-krcp-21-099suppl1.pdf]

**Supplementary Table 1. Multivariate Cox proportional hazards models for incident chronic kidney disease**

| Model                   |                                                                                       |
|-------------------------|---------------------------------------------------------------------------------------|
| Cox models              |                                                                                       |
| Model 1                 | Adjusted for age, sex, educational attainment, and income level                       |
| Model 2                 | Model 1 + smoking status, BMI, and history of DM and dyslipidemia                     |
| Model 3                 | Model 2 + eGFR, total cholesterol, albumin, and hemoglobin                            |
| Time-updated Cox models |                                                                                       |
| Model 1                 | Adjusted for sex, educational attainment, income level, and time-updated age          |
| Model 2                 | Model 1 + smoking status, history of DM and dyslipidemia, and time-updated BMI        |
| Model 3                 | Model 2 + baseline eGFR and albumin and time-updated total cholesterol and hemoglobin |

BMI, body mass index; DBP, diastolic blood pressure; DM, diabetes mellitus; eGFR, estimated glomerular filtration rate.
