# Supplementary material for: Association between blood pressure and the risk of chronic kidney disease in treatment-naïve hypertensive patients
Source: PubMed Central journal article supplement — Kidney Res Clin Pract. 2021 Nov 17;41(1):31–42. doi: 10.23876/j.krcp.21.099 (PMC8816410; doi:10.23876/j.krcp.21.099), 2021-11-17
Supplement: j-krcp-21-099suppl2.pdf [file j-krcp-21-099suppl2.pdf]

**Supplementary Table 2.** Baseline characteristics of the participants according to diastolic blood pressure

| Variable                             | DBP (mmHg)       |                      |                      |                      |                   |
|--------------------------------------|------------------|----------------------|----------------------|----------------------|-------------------|
|                                      | <70<br>(n = 727) | 70–79<br>(n = 2,180) | 80–89<br>(n = 2,405) | 90–99<br>(n = 1,450) | ≥100<br>(n = 581) |
| Age (yr)                             | 48.2 ± 7.8       | 50.3 ± 8.4           | 51.3 ± 8.6           | 53.5 ± 8.7           | 53.6 ± 8.4        |
| Female sex                           | 531 (73.0)       | 1,208 (55.4)         | 1,121 (46.6)         | 637 (43.9)           | 239 (41.1)        |
| SBP (mmHg)                           | 101.6 ± 10.0     | 112.2 ± 9.8          | 122.3 ± 10.7         | 134.8 ± 12.2         | 152.2 ± 15.0      |
| DBP (mmHg)                           | 63.6 ± 4.0       | 73.3 ± 3.0           | 82.7 ± 3.0           | 92.1 ± 2.7           | 104.2 ± 5.9       |
| Body mass index (kg/m <sup>2</sup> ) | 23.3 ± 2.9       | 23.9 ± 2.8           | 24.5 ± 3.0           | 25.0 ± 3.2           | 25.5 ± 3.2        |
| Education                            |                  |                      |                      |                      |                   |
| Low                                  | 169 (23.3)       | 566 (26.2)           | 738 (30.9)           | 568 (39.6)           | 238 (41.5)        |
| Intermediate                         | 161 (22.2)       | 516 (23.9)           | 548 (22.9)           | 333 (23.2)           | 127 (22.1)        |
| High                                 | 394 (54.4)       | 1,076 (49.9)         | 1,106 (46.2)         | 533 (37.2)           | 209 (36.4)        |
| Income                               |                  |                      |                      |                      |                   |
| Low                                  | 154 (21.5)       | 612 (28.5)           | 786 (33.3)           | 577 (40.7)           | 236 (41.5)        |
| Intermediate                         | 195 (27.2)       | 662 (30.9)           | 735 (31.2)           | 398 (28.1)           | 164 (28.8)        |
| High                                 | 367 (51.3)       | 871 (40.6)           | 837 (35.5)           | 442 (31.2)           | 169 (29.7)        |
| Married                              | 720 (99.2)       | 2,134 (98.6)         | 2,362 (98.7)         | 1,419 (98.9)         | 567 (98.4)        |
| Smoking                              |                  |                      |                      |                      |                   |
| Never                                | 527 (72.5)       | 1,346 (61.7)         | 1,320 (54.9)         | 789 (54.4)           | 302 (52.0)        |
| Former                               | 56 (7.7)         | 283 (13.0)           | 401 (16.7)           | 265 (18.3)           | 108 (18.6)        |
| Current                              | 144 (19.8)       | 551 (25.3)           | 684 (28.4)           | 396 (27.3)           | 171 (29.4)        |
| Diabetes mellitus                    | 26 (3.6)         | 114 (5.2)            | 129 (5.4)            | 79 (5.4)             | 30 (5.2)          |
| Dyslipidemia                         | 13 (1.8)         | 46 (2.1)             | 45 (1.9)             | 36 (2.5)             | 10 (1.7)          |
| Fasting glucose (mg/dL)              | 82.6 ± 18.0      | 85.0 ± 19.8          | 86.7 ± 18.1          | 88.3 ± 22.7          | 90.0 ± 22.7       |
| Creatinine (mg/dL)                   | 0.8 ± 0.1        | 0.8 ± 0.2            | 0.8 ± 0.2            | 0.8 ± 0.2            | 0.9 ± 0.2         |
| eGFR (mL/min/1.73 m <sup>2</sup> )   | 96.7 ± 12.8      | 94.1 ± 13.0          | 93.6 ± 13.1          | 91.6 ± 12.6          | 91.4 ± 13.0       |
| Total cholesterol (mg/dL)            | 182.0 ± 31.0     | 187.0 ± 34.3         | 190.5 ± 34.4         | 193.8 ± 36.2         | 195.8 ± 36.7      |
| Triglycerides (mg/dL)                | 127.6 ± 67.8     | 144.7 ± 87.8         | 160.6 ± 102.8        | 178.5 ± 121.9        | 185.8 ± 116.8     |
| HDL-C (mg/dL)                        | 45.9 ± 10.1      | 45.0 ± 9.9           | 44.6 ± 9.8           | 44.8 ± 10.4          | 45.0 ± 10.4       |
| LDL-C (mg/dL)                        | 110.6 ± 29.0     | 113.2 ± 31.8         | 114.1 ± 32.0         | 114.3 ± 33.5         | 113.8 ± 34.3      |
| Albumin (g/dL)                       | 4.2 ± 0.3        | 4.2 ± 0.3            | 4.3 ± 0.3            | 4.3 ± 0.3            | 4.3 ± 0.3         |
| Hemoglobin (g/dL)                    | 12.8 ± 1.5       | 13.4 ± 1.5           | 13.7 ± 1.6           | 13.9 ± 1.6           | 14.1 ± 1.5        |

Data are expressed as counts (%) for categorical variables and means ± standard deviations for continuous variables.

DBP, diastolic blood pressure; eGFR, estimated glomerular filtration rate; HDL-C, high-density lipoprotein cholesterol; LDL-C, low-density lipoprotein cholesterol; SBP, systolic blood pressure.
