# Supplementary material for: Association between blood pressure and the risk of chronic kidney disease in treatment-naïve hypertensive patients
Source: PubMed Central journal article supplement — Kidney Res Clin Pract. 2021 Nov 17;41(1):31–42. doi: 10.23876/j.krcp.21.099 (PMC8816410; doi:10.23876/j.krcp.21.099), 2021-11-17
Supplement: j-krcp-21-099suppl3.pdf [file j-krcp-21-099suppl3.pdf]

**Supplementary Table 3. Incidence rates of chronic kidney disease**

| Outcome                                                | SBP (mmHg)               |                         |                          |                         |                           |                            |         | DBP (mmHg)           |                         |                         |                            |                           | p-value |
|--------------------------------------------------------|--------------------------|-------------------------|--------------------------|-------------------------|---------------------------|----------------------------|---------|----------------------|-------------------------|-------------------------|----------------------------|---------------------------|---------|
|                                                        | <100<br>(n = 397)        | 100-119<br>(n = 3,016)  | 120-129<br>(n = 1,628)   | 130-139<br>(n = 1,148)  | 140-159<br>(n = 889)      | ≥160<br>(n = 265)          | p-value | <70<br>(n = 727)     | 70-79<br>(n = 2,180)    | 80-89<br>(n = 2,405)    | 90-99<br>(n = 1,450)       | ≥100<br>(n = 581)         |         |
| Overall                                                | 3,848<br>(6.3%)          | 28,891<br>(5.3%)        | 14,334<br>(7.6%)         | 8,646<br>(11.3%)        | 5,462<br>(13.9%)          | 1,151<br>(14.7%)           |         | 6,999<br>(6.7%)      | 20,399<br>(6.3%)        | 21,063<br>(8.3%)        | 10,725<br>(10.3%)          | 3,145<br>(11.5%)          |         |
| Person-year                                            | 62,331                   | 62,331                  | 62,331                   | 62,331                  | 62,331                    | 62,331                     |         | 62,331               | 62,331                  | 62,331                  | 62,331                     | 62,331                    |         |
| Incident CKD                                           | 603<br>(8.2%)            | 603                     | 603                      | 603                     | 603                       | 603                        |         | 603                  | 603                     | 603                     | 603                        | 603                       |         |
| Incidence rate<br>per 1,000<br>person-year<br>(95% CI) | 9.67<br>(8.92-<br>10.48) | 5.57<br>(4.75-<br>6.50) | 8.65<br>(7.20-<br>10.31) | 15<br>(12.56-<br>17.85) | 22.7<br>(18.88-<br>27.07) | 33.88<br>(24.09-<br>46.32) | <0.001  | 7<br>(5.18-<br>9.26) | 6.72<br>(5.64-<br>7.94) | 9.5<br>(8.22-<br>10.91) | 13.99<br>(11.84-<br>16.41) | 21.3<br>(16.51-<br>27.05) | <0.001  |

CI, confidence interval; CKD, chronic kidney disease; DBP, diastolic blood pressure; SBP, systolic blood pressure.
