# Supplementary material for: Association between blood pressure and the risk of chronic kidney disease in treatment-naïve hypertensive patients
Source: PubMed Central journal article supplement — Kidney Res Clin Pract. 2021 Nov 17;41(1):31–42. doi: 10.23876/j.krcp.21.099 (PMC8816410; doi:10.23876/j.krcp.21.099), 2021-11-17
Supplement: j-krcp-21-099suppl4.pdf [file j-krcp-21-099suppl4.pdf]

**Supplementary Table 4. Relationship between blood pressure and chronic kidney disease (baseline)**

| Variable          | Unadjusted        |         | Model 1          |         | Model 2          |         | Model 3          |         |
|-------------------|-------------------|---------|------------------|---------|------------------|---------|------------------|---------|
|                   | HR (95% CI)       | p-value | HR (95% CI)      | p-value | HR (95% CI)      | p-value | HR (95% CI)      | p-value |
| <b>SBP (mmHg)</b> |                   |         |                  |         |                  |         |                  |         |
| <100              | 1.13 (0.74–1.72)  | 0.57    | 1.37 (0.89–2.09) | 0.15    | 1.63 (1.06–2.50) | 0.03    | 1.66 (1.08–2.54) | 0.02    |
| 100–119           | (Reference)       |         | (Reference)      |         | (Reference)      |         | (Reference)      |         |
| 120–129           | 1.62 (1.28–2.05)  | <0.001  | 1.32 (1.04–1.67) | 0.02    | 1.22 (0.96–1.55) | 0.1     | 1.35 (1.06–1.71) | 0.01    |
| 130–139           | 2.99 (2.37–3.77)  | <0.001  | 1.82 (1.43–2.31) | <0.001  | 1.71 (1.35–2.17) | <0.001  | 1.96 (1.54–2.48) | <0.001  |
| 140–159           | 4.98 (3.93–6.30)  | <0.001  | 2.64 (2.06–3.37) | <0.001  | 2.35 (1.84–3.01) | <0.001  | 2.66 (2.08–3.40) | <0.001  |
| ≥160              | 9.19 (6.45–13.11) | <0.001  | 3.61 (2.51–5.20) | <0.001  | 3.04 (2.11–4.38) | <0.001  | 3.78 (2.62–5.47) | <0.001  |
| <b>DBP (mmHg)</b> |                   |         |                  |         |                  |         |                  |         |
| <70               | 1.02 (0.74–1.41)  | 0.9     | 1.21 (0.87–1.68) | 0.25    | 1.34 (0.97–1.87) | 0.08    | 1.44 (1.04–2.01) | 0.03    |
| 70–79             | (Reference)       |         | (Reference)      |         | (Reference)      |         | (Reference)      |         |
| 80–89             | 1.46 (1.17–1.81)  | 0.001   | 1.42 (1.14–1.77) | 0.002   | 1.32 (1.06–1.64) | 0.01    | 1.35 (1.09–1.69) | 0.007   |
| 90–99             | 2.31 (1.83–2.92)  | <0.001  | 1.90 (1.50–2.40) | <0.001  | 1.76 (1.39–2.23) | <0.001  | 1.90 (1.50–2.40) | <0.001  |
| ≥100              | 3.94 (2.94–5.29)  | <0.001  | 3.23 (2.40–4.34) | <0.001  | 2.84 (2.10–3.83) | <0.001  | 3.00 (2.22–4.05) | <0.001  |

CI, confidence interval; DBP, diastolic blood pressure; HR, hazard ratio; SBP, systolic blood pressure.

Model 1: adjusted for age, sex, educational attainment, and income level; model 2: model 1 + smoking status, body mass index, and history of diabetes mellitus and dyslipidemia; model 3: model 2 + estimated glomerular filtration rate, total cholesterol, albumin, and hemoglobin.
