# Supplementary material for: Association between blood pressure and the risk of chronic kidney disease in treatment-naïve hypertensive patients
Source: PubMed Central journal article supplement — Kidney Res Clin Pract. 2021 Nov 17;41(1):31–42. doi: 10.23876/j.krcp.21.099 (PMC8816410; doi:10.23876/j.krcp.21.099), 2021-11-17
Supplement: j-krcp-21-099suppl5.pdf [file j-krcp-21-099suppl5.pdf]

**Supplementary Table 5. Relationship between blood pressure and chronic kidney disease (time-varying)**

| Variable          | Unadjusted       |         | Model 1          |         | Model 2          |         | Model 3          |         |
|-------------------|------------------|---------|------------------|---------|------------------|---------|------------------|---------|
|                   | HR (95% CI)      | p-value |
| <b>SBP (mmHg)</b> |                  |         |                  |         |                  |         |                  |         |
| <100              | 0.84 (0.56–1.25) | 0.39    | 1.01 (0.68–1.51) | 0.95    | 1.13 (0.76–1.69) | 0.53    | 1.12 (0.75–1.67) | 0.57    |
| 100–119           | (Reference)      |         | (Reference)      |         | (Reference)      |         | (Reference)      |         |
| 120–129           | 1.16 (0.90–1.48) | 0.25    | 0.95 (0.74–1.21) | 0.67    | 0.87 (0.68–1.11) | 0.27    | 0.93 (0.73–1.19) | 0.55    |
| 130–139           | 2.13 (1.69–2.69) | <0.001  | 1.45 (1.14–1.85) | 0.002   | 1.30 (1.02–1.66) | 0.04    | 1.39 (1.10–1.77) | 0.007   |
| 140–159           | 3.18 (2.53–3.99) | <0.001  | 1.92 (1.51–2.45) | <0.001  | 1.72 (1.35–2.21) | <0.001  | 1.79 (1.40–2.28) | <0.001  |
| ≥160              | 7.13 (5.28–9.62) | <0.001  | 3.42 (2.49–4.70) | <0.001  | 3.22 (2.35–4.40) | <0.001  | 3.22 (2.35–4.40) | <0.001  |
| <b>DBP (mmHg)</b> |                  |         |                  |         |                  |         |                  |         |
| <70               | 0.99 (0.74–1.31) | 0.93    | 0.98 (0.74–1.31) | 0.91    | 1.02 (0.76–1.35) | 0.92    | 1.05 (0.79–1.40) | 0.73    |
| 70–79             | (Reference)      |         | (Reference)      |         | (Reference)      |         | (Reference)      |         |
| 80–89             | 1.21 (0.98–1.50) | 0.07    | 1.20 (0.98–1.48) | 0.08    | 1.17 (0.95–1.45) | 0.14    | 1.19 (0.97–1.47) | 0.10    |
| 90–99             | 1.89 (1.49–2.38) | <0.001  | 1.88 (1.49–2.37) | <0.001  | 1.79 (1.42–2.27) | <0.001  | 1.88 (1.48–2.37) | <0.001  |
| ≥100              | 3.79 (2.84–5.05) | <0.001  | 4.08 (3.05–5.46) | <0.001  | 3.93 (2.93–5.27) | <0.001  | 4.30 (3.20–5.76) | <0.001  |

CI, confidence interval; DBP, diastolic blood pressure; HR, hazard ratio; SBP, systolic blood pressure.

Model 1: adjusted for sex, educational attainment, income level, and time-updated age; model 2: model 1 + smoking status, history of diabetes mellitus and dyslipidemia, and time-updated body mass index; model 3: model 2 + baseline estimated glomerular filtration rate and albumin and time-updated total cholesterol and hemoglobin.
