# Supplementary material for: Association between blood pressure and the risk of chronic kidney disease in treatment-naïve hypertensive patients
Source: PubMed Central journal article supplement — Kidney Res Clin Pract. 2021 Nov 17;41(1):31–42. doi: 10.23876/j.krcp.21.099 (PMC8816410; doi:10.23876/j.krcp.21.099), 2021-11-17
Supplement: j-krcp-21-099suppl6.pdf [file j-krcp-21-099suppl6.pdf]

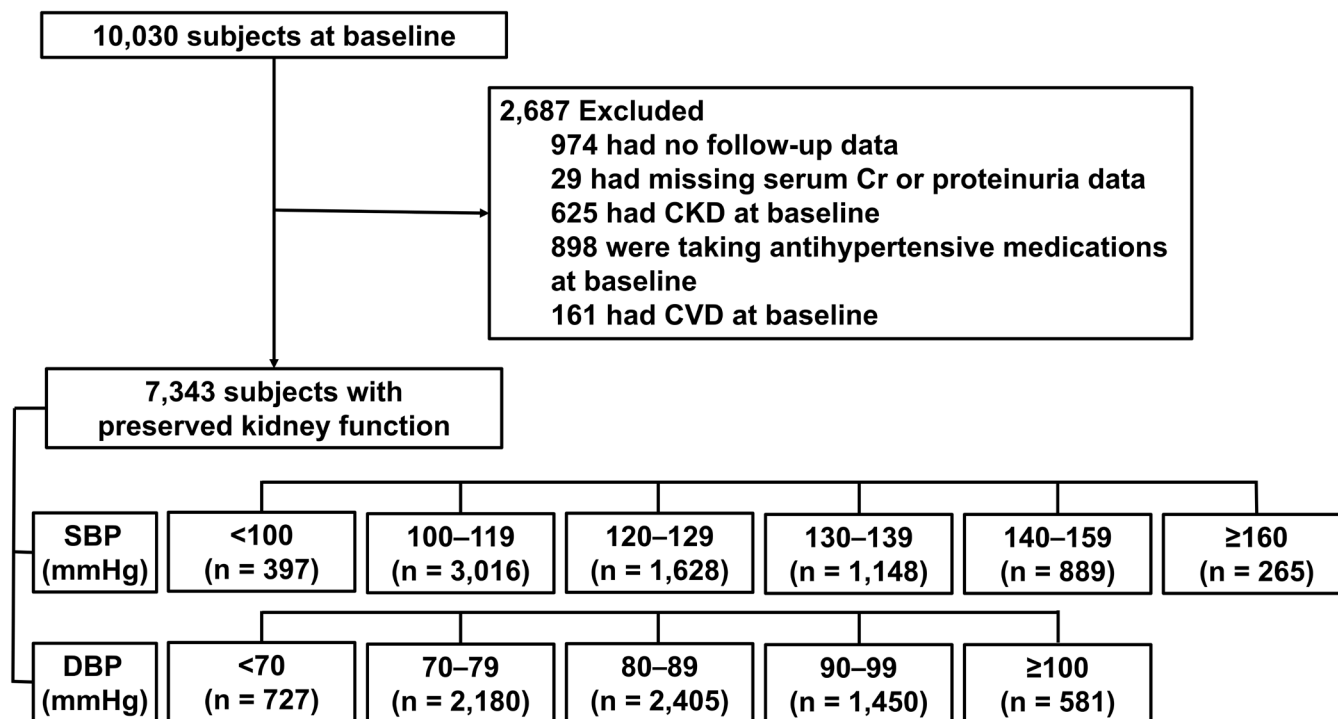

**Supplementary Figure 1. Flow chart of analysis.**

CKD, chronic kidney disease; Cr, creatinine; CVD, cardiovascular disease; DBP, diastolic blood pressure; SBP, systolic blood pressure.
